# Supplementary material for: Enhanced oxidative stability of non-Grignard magnesium electrolytes through ligand modification
Source: Royal Society of Chemistry journal article supplement (doi:10.1039/c3cc47277a), 2013-11-26
Supplement: c3cc47277a.pdf [file c3cc47277a.pdf]

Electronic Supplementary Information for:

# Enhanced Oxidative Stability of non-Grignard Magnesium Electrolytes through Ligand Modification

Emily G. Nelson, Jeff W. Kampf, and Bart M. Bartlett\*

Department of Chemistry, University of Michigan  
930 N. University Ave. Ann Arbor MI, 48109-1055

| <i>Index</i>                                                                                                                                                                                                                            | <i>Page</i> |
|-----------------------------------------------------------------------------------------------------------------------------------------------------------------------------------------------------------------------------------------|-------------|
| Detailed Experimental Section                                                                                                                                                                                                           | S2          |
| <b>Figure S1.</b> Cyclic voltammetry of all synthesized electrolytes                                                                                                                                                                    | S5          |
| <b>Figure S2.</b> Cyclic voltammogram in the presence of ferrocene                                                                                                                                                                      | S6          |
| <b>Figure S3.</b> Hammett plot of anodic current at 3 V vs. $\text{Mg}^{2+/0}$                                                                                                                                                          | S6          |
| <b>Figure S4.</b> Cyclic voltammetry of $\text{AlCl}_3$ -THF solution                                                                                                                                                                   | S7          |
| <b>Figure S5.</b> Cyclic voltammograms of $(\text{FMPMC})_2\text{-AlCl}_3/\text{THF}$ and $(\text{PFPMC})_2\text{-AlCl}_3/\text{THF}$ solutions.                                                                                        | S7          |
| <b>Figure S6.</b> Steady state voltammogram of $(\text{FMPMC})_2\text{-AlCl}_3/\text{THF}$ performed at a scan rate of 1 mV/s.                                                                                                          | S8          |
| <b>Figure S7.</b> Discharge curves of $\text{Mo}_6\text{S}_8$ vs. Mg-foil in $(\text{FMPMC})_4\text{-AlCl}_3/\text{THF}$ electrolyte.                                                                                                   | S8          |
| <b>Table S1.</b> $^{27}\text{Al}$ NMR assignments and shifts for $(\text{FMPMC})_x\text{-AlCl}_3/\text{THF}$ at various Lewis acid-to-base ratios                                                                                       | S9          |
| <b>Table S2.</b> $^{27}\text{Al}$ NMR assignments for 0.5 M electrolyte solutions.                                                                                                                                                      | S10         |
| <b>Figure S8.</b> X-ray crystal structure of $\text{Mg}_5\text{Cl}_2\text{C}_{62}\text{H}_{82}\text{O}_{18}$ crystallized from the $(\text{MPMC})_2\text{-AlCl}_3/\text{THF}$ electrolyte solution.                                     | S11         |
| <b>Table S3.</b> Crystal data and structure refinement for en5055                                                                                                                                                                       | S11         |
| <b>Figure S9.</b> X-ray crystal structures of the molecular ions $[\text{Mg}_2\text{Cl}_3(\text{THF})_6]^+$ and $[(\text{FMP})\text{AlCl}_3]^-$ crystallized from the $(\text{FMPMC})_2\text{-AlCl}_3/\text{THF}$ electrolyte solution. | S12         |
| <b>Table S4.</b> Crystal data and structure refinement for en51302a                                                                                                                                                                     | S12         |
| <b>Figure S10.</b> Electrospray ionization mass spectra of $(\text{FMPMC})_2\text{-AlCl}_3/\text{THF}$ electrolyte                                                                                                                      | S13         |
| <b>Figure S11.</b> Raman Spectra of $(\text{FMPMC})_2\text{-AlCl}_3/\text{THF}$                                                                                                                                                         | S14         |
| <b>Figure S12.</b> $^{27}\text{Al}$ NMR spectra of $(\text{FMPMC})_2\text{-AlCl}_3/\text{THF}$ before and after oxidation.                                                                                                              | S14         |

## Experimental Section

**General considerations.** Ethylmagnesium chloride and all phenols were purchased from Sigma Aldrich, and used as received. Tetrahydrofuran solvent was purchased from VWR, and distilled over sodium with a benzophenone-ketyl indicator.  $^{27}\text{Al}$  NMR was performed on a Varian VNMRs-700 MHz spectrometer in THF with chemical shifts reported relative to a solution of  $\text{AlCl}_3$  in  $\text{D}_2\text{O}$  with a drop of concentrated  $\text{HCl}$ .  $^1\text{H}$ ,  $^{13}\text{C}$ , and  $^{19}\text{F}$  NMR were performed on a Varian MR-400 MHz spectrometer in THF. Conductivity measurements were carried out using a YSI Model 3200 conductivity meter equipped with a 3253 conductivity cell at room temperature. Mass spectrometry was performed on a Micromass LCT Time-of-Flight mass spectrometer with electrospray ionization. Raman spectra were collected using a Renishaw inVia Raman microscope with a Leica microscope, RenCam CCD detector, 785 nm laser, 1200 lines/mm grating, and 50  $\mu\text{m}$  slit. The spectra were collected in extended scan mode (10 second scan with 100 accumulations) in the range of 2000 – 200  $\text{cm}^{-1}$ .

**Synthesis.** All compounds were prepared and handled using standard Schlenk techniques under  $\text{N}_2$  and an  $\text{N}_2$ -filled glove box (Vacuum Atmospheres). All electrolyte solutions were synthesized in the exact same manner, with details for  $(\text{FMPMC})_2\text{-AlCl}_3$  in THF presented here. 4-(trifluoromethyl)phenol (14 mmol, 2.27 g) was dissolved in dry THF (7 mL) with stirring in a 25 mL three neck round bottom flask equipped with a stir bar, rubber septa, glass stopper and a gas inlet adapter. Then, 2 M  $\text{EtMgCl}$  in THF (14 mmol, 7 mL) was slowly added via syringe. This solution was stirred for 8 hours, giving a suspension of 4-(trifluoromethyl)phenolatemagnesium chloride (FMPMC)/THF. A solution of  $\text{AlCl}_3$  (0.5 M in 14 mL) was prepared by mixing  $\text{AlCl}_3$  (0.934 g, 7 mmol) with THF (14 mL) in a 25 mL three neck round bottom flask under  $\text{N}_2$  purge that is cooled to 0  $^\circ\text{C}$  in an ice bath. This solution was warmed to room temperature and then added via syringe to the phenolate solution, and stirred for 5 hours, giving a clear solution of 0.5 M  $(\text{FMPMC})_2\text{-AlCl}_3/\text{THF}$ .

### NMR solution structures.

In an effort to assign the  $^{27}\text{Al}$  NMR spectra of the as-synthesized electrolyte, we prepared a series of solutions comprised of differing ratios between the Lewis acid ( $\text{AlCl}_3$ ) and base (FMPMC). At high base-to-acid ratios, the main solution species should be the tetrakisphenolate  $[\text{Al}(\text{FMP})_4]^-$ . Accordingly, the NMR spectrum of  $(\text{FMPMC})_4\text{-AlCl}_3/\text{THF}$  shows a single sharp peak at 50 ppm (referenced to  $\text{AlCl}_3$  in  $\text{HCl}$ ), expected for the tetrahedral anion. As the ratio of base to acid decreases, three additional broader peaks are observed at 60, 73, and 86 ppm. These peaks are attributed to a sequential loss of ligand,  $\text{Al}(\text{FMP})_3\text{Cl}$ ,  $\text{Al}(\text{FMP})_2\text{Cl}_2^-$ , and  $\text{Al}(\text{FMP})\text{Cl}_3^-$  respectively. These spectra also exhibited a sharp peak at 102 ppm, which was assigned as  $\text{Al}_2\text{Cl}_6$  and used as an internal standard.<sup>1</sup> At high acid-to-base ratios of the electrolyte  $[(\text{FMPMC})\text{-(AlCl}_3)_4/\text{THF}]$ , the spectra show the expected  $\text{AlCl}_3$  peak at 63 ppm and a second sharp peak at 91 ppm. The sharpness of the 91 ppm peak suggests that aluminium is tetrahedrally coordinated, while its upfield shift with respect to the dimer  $\text{Al}_2\text{Cl}_6$  (102 ppm) suggests an increased number of organic ligands and so the 91 ppm shift is assigned to  $\text{Al}_2(\text{FMP})_2\text{Cl}_4$ . The similarity in shift to  $\text{Al}(\text{FMP})\text{Cl}_3^-$  (86 ppm) further supports the assignment of a single organic ligand on each metal center, and such organochloroaluminate dimers have been previously reported.<sup>2</sup> A complete table of  $^{27}\text{Al}$  NMR shifts at the differing acid base ratios and their assignments are presented in Table S1.

### ***NMR Data***

(FMPMC)<sub>2</sub>-AlCl<sub>3</sub>/THF – <sup>1</sup>H 7.4 – 6.9(m) <sup>13</sup>C 163.8, 163.5, 163.2, 126.8, 126.07, 126.04, 126.00, 124.1, 119.76, 119.69, 119.62 <sup>19</sup>F –62.7, –62.9.

(BPMC)<sub>2</sub>-AlCl<sub>3</sub>/THF – <sup>1</sup>H 7.0 – 6.6(m), 1.21, 1.20 <sup>13</sup>C 157.5, 156.1, 154.9, 141.1, 138.6, 128.6, 127.9, 125.3, 125.2, 125.1, 124.7, 119.0, 118.9, 118.8, 118.7, 33.43, 33.39, 33.29, 31.1, 31.0, 30.9.

(PMC)<sub>2</sub>-AlCl<sub>3</sub>/THF – <sup>1</sup>H 7.1–6.5(m) <sup>13</sup>C 160.3, 160.2, 160.1, 128.8, 128.6, 128.5, 128.3, 128.2, 120.0, 119.9, 119.8, 119.7, 119.6, 117.1, 116.8.

(MePMC)<sub>2</sub>-AlCl<sub>3</sub>/THF <sup>1</sup>H 6.8–6.6 (m) <sup>13</sup>C 157.7, 157.4, 155.5, 155.3, 129.39, 129.34, 129.24, 129.19, 129.10, 129.05, 128.84, 128.79, 125.27, 119.62, 119.55, 119.50, 119.31, 119.25, 114.95, 114.92, 19.92, 19.89, 19.87.

(MPMC)<sub>2</sub>-AlCl<sub>3</sub>/THF <sup>1</sup>H 6.91–6.57 (m) <sup>13</sup>C 154.87, 154.39, 154.30, 154.14, 152.99, 152.79, 121.35, 121.31, 120.86, 120.75, 116.80, 115.44, 115.16, 115.13, 114.97, 114.92, 56.19, 56.19, 56.16, 56.12, 56.07.

(PFPMC)<sub>2</sub>-AlCl<sub>3</sub>/THF <sup>13</sup>C 141.84, 139.45, 139.05, 136.63, 135.08, 134.24, 131.84 <sup>19</sup>F –162.45, –163.4, –164.4, –165.4, –171.3, –178.6.

### ***X-ray Structure Determination for C<sub>62</sub>H<sub>82</sub>Cl<sub>2</sub>Mg<sub>5</sub>O<sub>18</sub> (CCDC # 962673)***

Colorless needles of **en5055** were grown from a tetrahydrofuran/hexane solution at 23 °C. A crystal of dimensions 0.44 x 0.30 x 0.23 mm was mounted on a Bruker SMART APEX-I CCD-based X-ray diffractometer equipped with a low temperature device and fine focus Mo-target X-ray tube ( $\lambda = 0.71073$  Å) operated at 1500 W power (50 kV, 30 mA). The X-ray intensities were measured at 85(1) K; the detector was placed at a distance 5.081 cm from the crystal. A total of 4905 frames were collected with a scan width of 0.5° in  $\omega$  and 0.45° in  $\phi$  with an exposure time of 20 s/frame. The integration of the data yielded a total of 351974 reflections to a maximum  $2\theta$  value of 70.00° of which 29000 were independent and 23284 were greater than  $2\sigma(I)$ . The final cell constants (Table S3) were based on the xyz centroids of 9459 reflections above  $10\sigma(I)$ . Analysis of the data showed negligible decay during data collection; the data were processed with SADABS and corrected for absorption. The structure was solved and refined with the Bruker SHELXTL (version 2008/4) software package, using the space group P2(1)/c with  $Z = 4$  for the formula C<sub>62</sub>H<sub>82</sub>Cl<sub>2</sub>Mg<sub>5</sub>O<sub>18</sub>. All non-hydrogen atoms were refined anisotropically with the hydrogen atoms placed in idealized positions. Full matrix least-squares refinement based on  $F^2$  converged at  $R1 = 0.0423$  and  $wR2 = 0.1067$  [based on  $I > 2\sigma(I)$ ],  $R1 = 0.0575$  and  $wR2 = 0.1178$  for all data. Two THF ligands and one phenolate ligand are disordered and were refined with partial occupancy orientations constrained to sum to one. Additional details are presented in Table S3 and are given as Supporting Information in a CIF file.<sup>3–5</sup>

### ***X-ray Structure Determination for C<sub>31</sub>H<sub>52</sub>F<sub>3</sub>O<sub>7</sub>Mg<sub>2</sub>AlCl<sub>6</sub> (CCDC # 962674)***

Colorless blocks of **en51302a** were grown from a hexane/tetrahydrofuran solution of the compound at 23 °C. A crystal of dimensions 0.18 x 0.10 x 0.10 mm was mounted on a Rigaku AFC10K Saturn 944+ CCD-based X-ray diffractometer equipped with a low temperature device and Micromax-007HF Cu-target micro-focus rotating anode ( $\lambda = 1.54187$  Å) operated at 1.2 kW power (40 kV, 30 mA). The X-ray intensities were measured at 85(1) K with the detector placed at a distance 42.00 mm from the crystal. A total of 4336 images were collected with an oscillation width of 1.0° in  $\omega$ . The exposure time was 1 sec. for the low angle images, 5 sec. for high angle. The integration of the data yielded a total of 243483

reflections to a maximum  $2\theta$  value of  $136.46^\circ$  of which 7714 were independent and 7043 were greater than  $2\sigma(I)$ . The final cell constants (Table S4) were based on the xyz centroids 143984 reflections above  $10\sigma(I)$ . Analysis of the data showed negligible decay during data collection; the data were processed with CrystalClear 2.0 and corrected for absorption. The structure was solved and refined with the Bruker SHELXTL (version 2008/4) software package, using the space group *Pbca* with  $Z = 8$  for the formula  $C_{31}H_{52}F_3O_7Mg_2AlCl_6$ . All non-hydrogen atoms were refined anisotropically with the hydrogen atoms placed in idealized positions. The THF ligands are extensively disordered. Full matrix least-squares refinement based on  $F^2$  converged at  $R1 = 0.0807$  and  $wR2 = 0.2135$  [based on  $I > 2\sigma(I)$ ],  $R1 = 0.0843$  and  $wR2 = 0.2162$  for all data. Additional details are presented in Table S4 and are given as Supporting Information in a CIF file. Acknowledgement is made for funding from NSF grant CHE-0840456 for X-ray instrumentation.<sup>3,6</sup>

**Electrochemistry.** Cyclic voltammograms were recorded using a CH Instruments Electrochemical Workstation 1000A with a Pt-disk working electrode and Mg-foil counter- and reference electrodes. Measurements were carried out at a scan rate of 25 mV/s, starting at OCP (ranging from 1.5 – 1.7 vs  $Mg^{2+/0}$ ) and scanned cathodically. All electrolyte solutions were 0.5 M (based on Mg) in THF, and measurements were performed using a custom-designed sealed cell in an  $N_2$  box to avoid concentration change during the measurements. Referencing to the  $Fc^{+/0}$  couple was carried out in a 0.5M (FMPMC)<sub>2</sub>- $AlCl_3$ /THF solution containing 10 mM ferrocene in THF with a Pt wire working electrode, a Mg foil auxiliary electrode, and a Mg foil reference electrode. Electrolyte stability was examined by opening a vial of the electrolyte to air, and allowing it to stir for 1 hour, followed by stirring for an additional 5 hours while lightly capped to minimize solvent evaporation. The slurry of  $Mo_6S_8$  was made by mixing an 8:1:1 weight-ratio mixture of  $Mo_6S_8$ , super-P carbon powder, and polyvinylidene fluoride (PVDF) binder in N-methyl-2-pyrrolidinone (NMP). The cathode slurry was placed on a Pt current collector and dried in an oven at 120 °C. The active material loading was approximately 2 mg/cm<sup>2</sup>. The cathode was placed in an electrochemical cell with a Mg foil anode and 0.5M (FMPMC)<sub>2</sub>- $AlCl_3$ /THF electrolyte. The charge-discharge tests of the cell were carried on a Vencon UBA4 battery analyzer charger and conditioner (Toronto, Canada) with cut-off voltages of 2.0 and 0.2 V vs.  $Mg^{2+/0}$ .

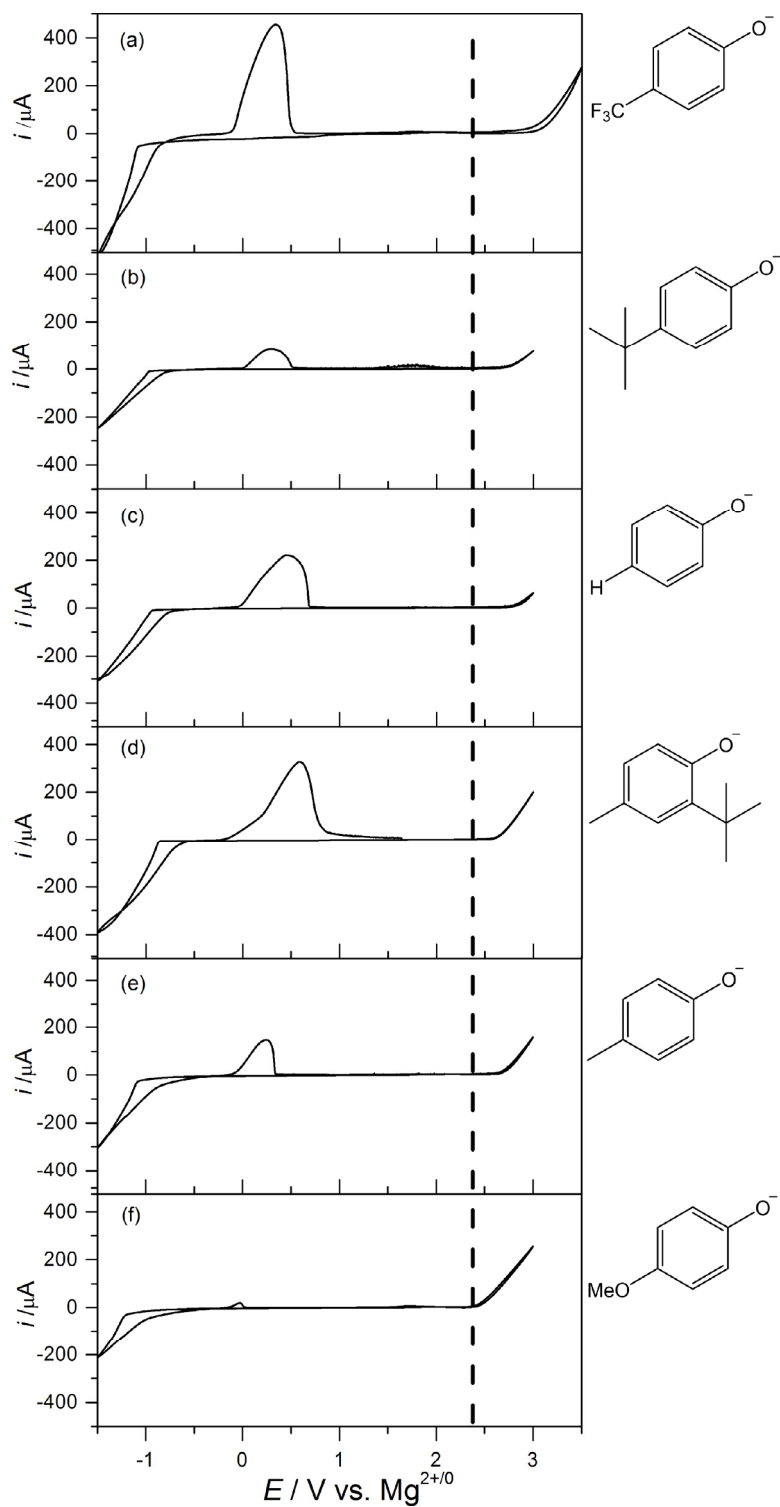

**Figure S1.** Cyclic voltammograms of a) (FMPMC)<sub>2</sub>-AlCl<sub>3</sub>/THF, b) (BPMC)<sub>2</sub>-AlCl<sub>3</sub>/THF, c) (PMC)<sub>2</sub>-AlCl<sub>3</sub>/THF, d) (BMPMC)<sub>2</sub>-AlCl<sub>3</sub>/THF e) (MePMC)<sub>2</sub>-AlCl<sub>3</sub>/THF, f) (MPMC)<sub>2</sub>-AlCl<sub>3</sub>/THF. The scan rate is 25 mV/s. The best previously reported electrolyte [(2-tert-butyl-4-methyl-phenolate magnesium chloride)<sub>2</sub>AlCl<sub>3</sub>/THF, (BMPMC)<sub>2</sub>AlCl<sub>3</sub>/THF]<sup>[7]</sup> was prepared and is included below for comparison. The phenolate ligands are shown for clarity.

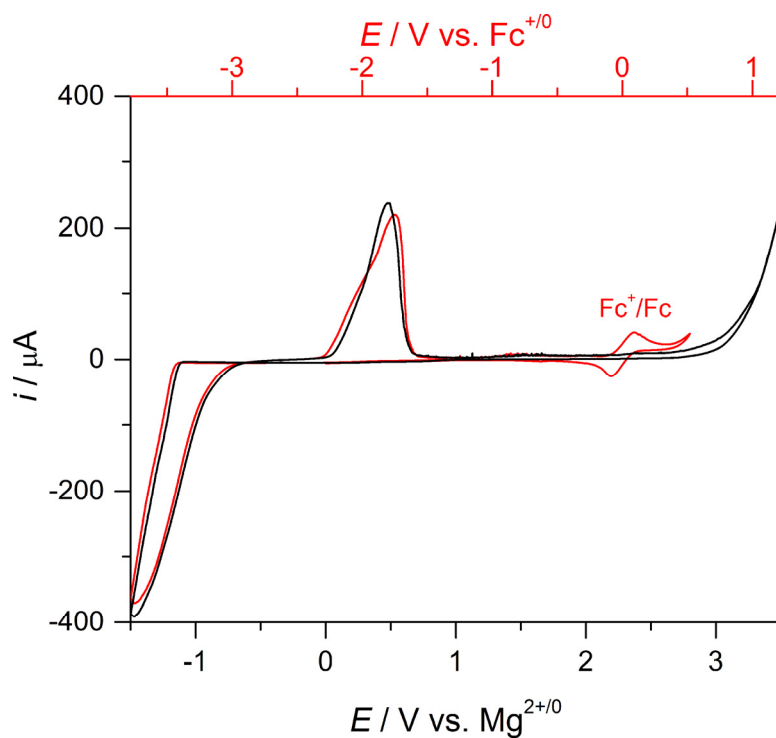

**Figure S2.** Cyclic voltammogram of (FMPMC)<sub>2</sub>-AlCl<sub>3</sub>/THF without (black) and with (red) 10 mM ferrocene. Electrochemistry was carried out with a Pt wire working electrode, a Mg foil auxiliary electrode, and a Mg foil reference electrode.

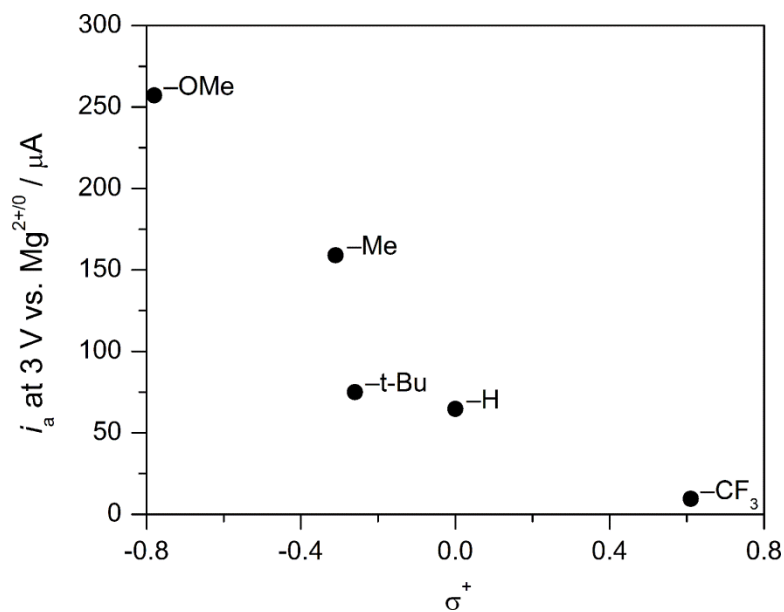

**Figure S3.** Hammett plot of anodic current at 3 V vs.  $\text{Mg}^{2+/0}$  vs.  $\sigma^+$  values of *p*-substituted phenols.

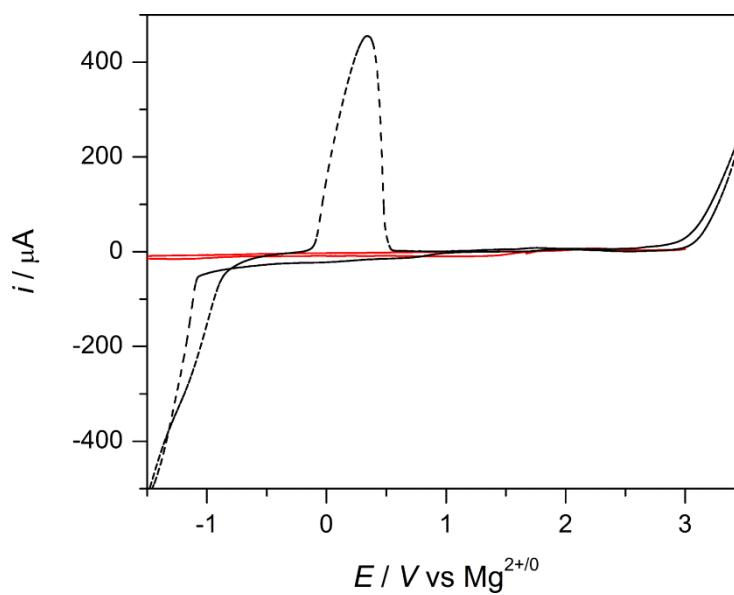

**Figure S4.** Cyclic voltammogram of 0.25M  $\text{AlCl}_3$  in THF (—) and  $(\text{FMPMC})_2\text{-AlCl}_3/\text{THF}$  (---).

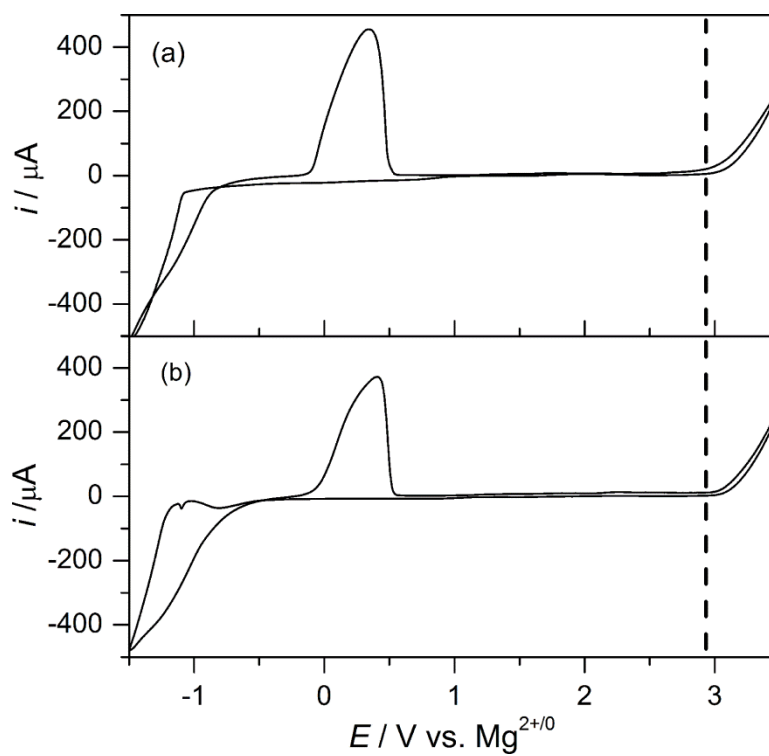

**Figure S5.** Cyclic voltammograms of Pt electrodes in 0.5 M a)  $(\text{FMPMC})_2\text{-AlCl}_3/\text{THF}$  and b)  $(\text{PFPMC})_2\text{-AlCl}_3/\text{THF}$  solutions. The scan rate is 25 mV/s and the dashed line is added as a guide to the eye.

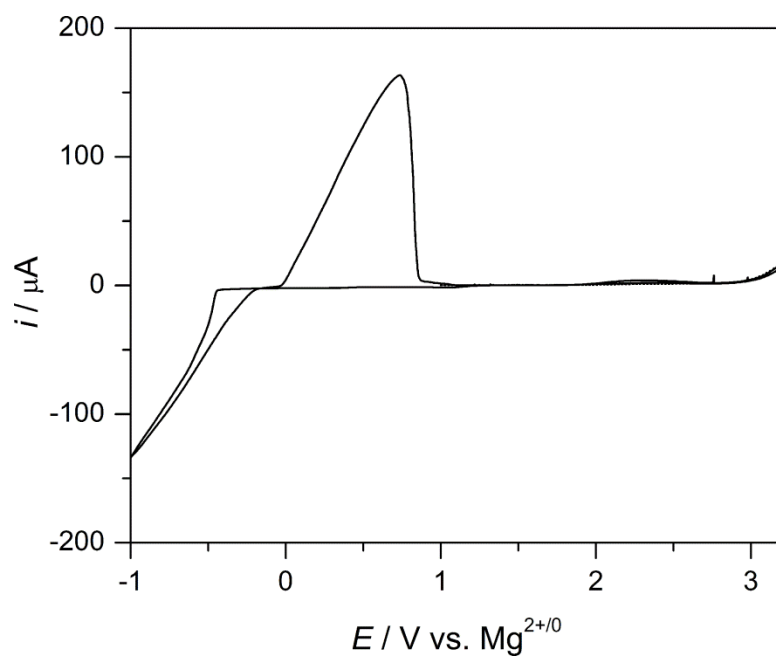

**Figure S6.** Steady-state cyclic voltammogram of  $(\text{FMPMC})_2\text{-AlCl}_3/\text{THF}$  performed at a scan rate of 1 mV/s.

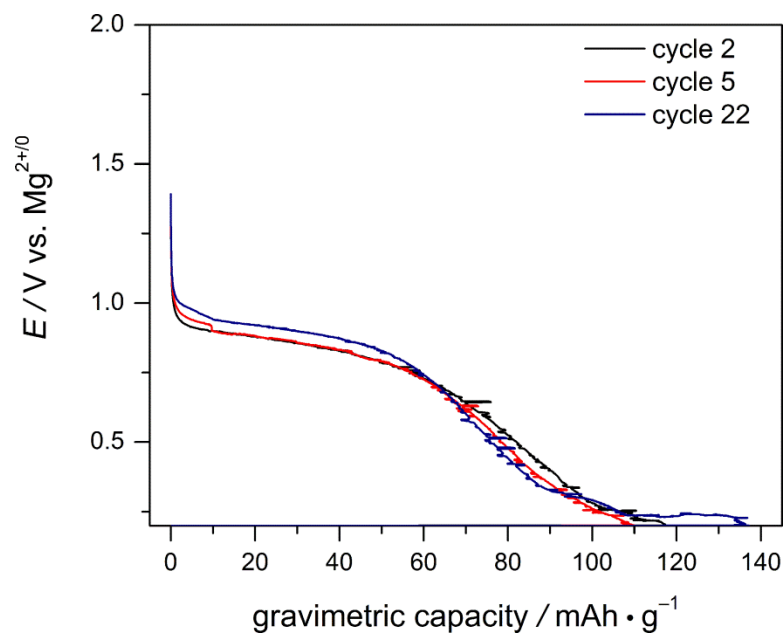

**Figure S7.** Discharge curves of  $\text{Mo}_6\text{S}_8$  vs. Mg-foil in  $(\text{FMPMC})_4\text{-AlCl}_3/\text{THF}$  electrolyte.



**Table S1.**  $^{27}\text{Al}$  NMR assignments and shifts for  $(\text{FMPMC})_x\text{-AlCl}_3/\text{THF}$  at various Lewis acid-to-base ratios.

| Solution                         | Peak Shift (ppm) | Assignment                                                                   |
|----------------------------------|------------------|------------------------------------------------------------------------------|
| 4:1 FMPMC–AlCl <sub>3</sub> /THF | 51               | (FMP) <sub>4</sub> Al                                                        |
| 2:1 FMPMC–AlCl <sub>3</sub> /THF | 51               | (FMP) <sub>4</sub> Al                                                        |
|                                  | 62               | (FMP) <sub>3</sub> AlCl <sup>(-)</sup> /(FMP) <sub>3</sub> Al                |
|                                  | 74               | (FMP) <sub>2</sub> AlCl <sub>2</sub> <sup>(-)</sup> /(FMP) <sub>2</sub> AlCl |
|                                  | 88               | (FMP)AlCl <sub>3</sub> <sup>(-)</sup> /(FMP)AlCl <sub>2</sub>                |
|                                  | 102              | Al <sub>2</sub> Cl <sub>6</sub>                                              |
| 3:2 FMPMC–AlCl <sub>3</sub> /THF | 51               | (FMP) <sub>4</sub> Al                                                        |
|                                  | 62               | (FMP) <sub>3</sub> AlCl <sup>(-)</sup> /(FMP) <sub>3</sub> Al                |
|                                  | 74               | (FMP) <sub>2</sub> AlCl <sub>2</sub> <sup>(-)</sup> /(FMP) <sub>2</sub> AlCl |
|                                  | 87               | (FMP)AlCl <sub>3</sub> <sup>(-)</sup> /(FMP)AlCl <sub>2</sub>                |
|                                  | 91               | (FMP) <sub>2</sub> Al <sub>2</sub> Cl <sub>4</sub>                           |
|                                  | 102              | Al <sub>2</sub> Cl <sub>6</sub>                                              |
| 1:4 FMPMC–AlCl <sub>3</sub> /THF | 63               | AlCl <sub>3</sub>                                                            |
|                                  | 91               | (FMP) <sub>2</sub> Al <sub>2</sub> Cl <sub>4</sub>                           |
|                                  | 102              | Al <sub>2</sub> Cl <sub>6</sub>                                              |
| AlCl <sub>3</sub> /THF           | 62               | AlCl <sub>3</sub>                                                            |
|                                  | 102              | Al <sub>2</sub> Cl <sub>6</sub>                                              |

**Table S2.** <sup>27</sup>Al NMR assignments for 0.5 M electrolyte solutions.

| Solution                                     | Peak Shift (ppm) | Assignment                                                                   |
|----------------------------------------------|------------------|------------------------------------------------------------------------------|
| (FMPMC) <sub>2</sub> –AlCl <sub>3</sub> /THF | 51               | (FMP) <sub>4</sub> Al                                                        |
|                                              | 62               | (FMP) <sub>3</sub> AlCl <sup>(-)</sup> /(FMP) <sub>3</sub> Al                |
|                                              | 74               | (FMP) <sub>2</sub> AlCl <sub>2</sub> <sup>(-)</sup> /(FMP) <sub>2</sub> AlCl |
|                                              | 88               | (FMP)AlCl <sub>3</sub> <sup>(-)</sup> /(FMP)AlCl <sub>2</sub>                |
|                                              | 102              | Al <sub>2</sub> Cl <sub>6</sub>                                              |
| (PMC) <sub>2</sub> –AlCl <sub>2</sub> /THF   | 60               | (P) <sub>3</sub> AlCl <sup>(-)</sup> /(P) <sub>3</sub> Al                    |
|                                              | 73               | (P) <sub>2</sub> AlCl <sub>2</sub> <sup>(-)</sup> /(P) <sub>2</sub> AlCl     |
|                                              | 86               | (P)AlCl <sub>3</sub> <sup>(-)</sup> /(P)Al <sub>2</sub>                      |
|                                              | 102              | Al <sub>2</sub> Cl <sub>6</sub>                                              |
| (MPMC) <sub>2</sub> –AlCl <sub>3</sub> /THF  | 71               | (MP) <sub>2</sub> AlCl <sub>2</sub> <sup>(-)</sup> /(MP) <sub>2</sub> AlCl   |
|                                              | 87               | (MP)AlCl <sub>3</sub> <sup>(-)</sup> /(MP)AlCl <sub>2</sub>                  |
|                                              | 102              | Al <sub>2</sub> Cl <sub>6</sub>                                              |
| (BPMC) <sub>2</sub> –AlCl <sub>3</sub> /THF  | 72               | (BP) <sub>2</sub> AlCl <sub>2</sub> <sup>(-)</sup> /(BP) <sub>2</sub> AlCl   |
|                                              | 86               | (BP)AlCl <sub>3</sub> <sup>(-)</sup> /(BP)AlCl <sub>2</sub>                  |
|                                              | 102              | Al <sub>2</sub> Cl <sub>6</sub>                                              |
| (MePMC) <sub>2</sub> –AlCl <sub>3</sub> /THF | 71               | (MeP) <sub>2</sub> AlCl <sub>2</sub> <sup>(-)</sup> /(MeP) <sub>2</sub> AlCl |
|                                              | 87               | (MeP)AlCl <sup>(-)</sup> /(MeP)AlCl <sub>2</sub>                             |
|                                              | 102              | Al <sub>2</sub> Cl <sub>6</sub>                                              |
| (PFPMC) <sub>2</sub> –AlCl <sub>3</sub> /THF | 45               | (PFP) <sub>4</sub> Al                                                        |
|                                              | 60               | (PFP) <sub>3</sub> AlCl <sup>(-)</sup> /(PFP) <sub>3</sub> Al                |
|                                              | 74               | (PFP) <sub>2</sub> AlCl <sub>2</sub> <sup>(-)</sup> /(PFP) <sub>2</sub> AlCl |
|                                              | 88               | (PFP)AlCl <sub>3</sub> <sup>(-)</sup> /(PFP)AlCl <sub>2</sub>                |
|                                              | 102              | Al <sub>2</sub> Cl <sub>6</sub>                                              |

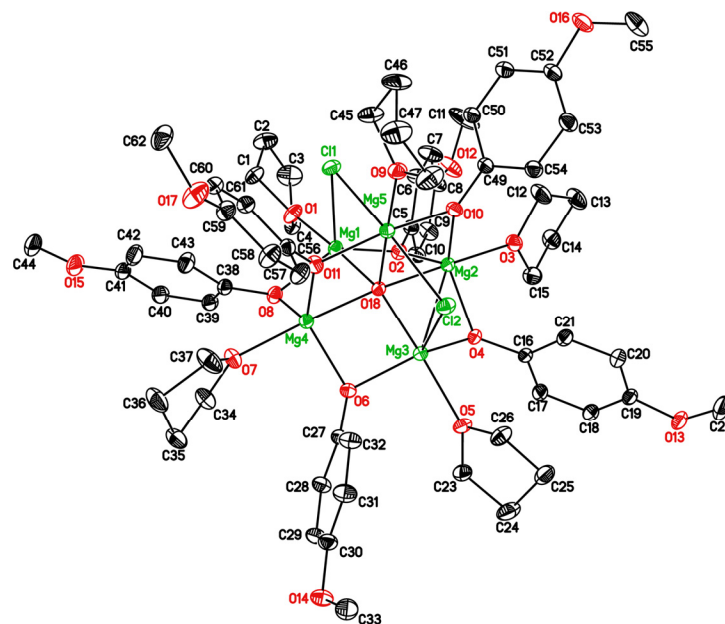

**Figure S8.** X-ray crystal structure of  $\text{Mg}_5\text{Cl}_2\text{C}_{62}\text{H}_{82}\text{O}_{18}$  crystallized from the  $(\text{MPMC})_2\text{-AlCl}_3/\text{THF}$  electrolyte solution.

**Table S3.** Crystal data and structure refinement for en5055 (CCDC # 962673)

|                                        |                                                                                           |
|----------------------------------------|-------------------------------------------------------------------------------------------|
| Identification code                    | en5055                                                                                    |
| Empirical formula                      | $\text{C}_{62}\text{H}_{82}\text{Cl}_2\text{Mg}_5\text{O}_{18}$                           |
| Formula weight                         | 1307.73                                                                                   |
| Temperature                            | 85(2) K                                                                                   |
| Wavelength                             | 0.71073 Å                                                                                 |
| Crystal system, space group            | Monoclinic, $P2_1/c$                                                                      |
| Unit cell dimensions                   | $a = 14.4018(5)$ Å<br>$b = 24.2154(8)$ Å $\beta = 104.534(1)^\circ$<br>$c = 19.5295(7)$ Å |
| Volume                                 | $6592.6(4)$ Å <sup>3</sup>                                                                |
| $Z$ , $\rho_{\text{calc}}$             | 4, 1.318 g/cm <sup>3</sup>                                                                |
| Absorption coefficient                 | $0.214 \text{ mm}^{-1}$                                                                   |
| $F(000)$                               | 2768                                                                                      |
| Crystal size                           | $0.44 \times 0.30 \times 0.23$ mm                                                         |
| $\theta$ range for data collection     | $1.37 - 35.00^\circ$                                                                      |
| Limiting indices                       | $-23 \leq h \leq 23$<br>$-38 \leq k \leq 38$<br>$-31 \leq l \leq 31$                      |
| Reflections collected/unique           | 351974 / 29000 [ $R(\text{int}) = 0.0626$ ]                                               |
| Completeness to $\theta = 35.00^\circ$ | 99.9%                                                                                     |
| Absorption correction                  | Semi-empirical from equivalents                                                           |
| Max. and min. transmission             | 0.9524 and 0.9116                                                                         |
| Refinement method                      | Full-matrix least-squares on $F^2$                                                        |
| Data / restraints / parameters         | 29000 / 165 / 878                                                                         |
| $G.o.F.$ on $F^2$                      | 1.006                                                                                     |
| Final $R$ indices [ $I > 2\sigma(I)$ ] | $R1 = 0.0423$ ; $wR2 = 0.1067$                                                            |
| $R$ indices (all data)                 | $R1 = 0.0575$ , $wR2 = 0.1178$                                                            |
| Largest diff. peak and hole            | 1.238 and $-0.275 \text{ eÅ}^{-3}$                                                        |

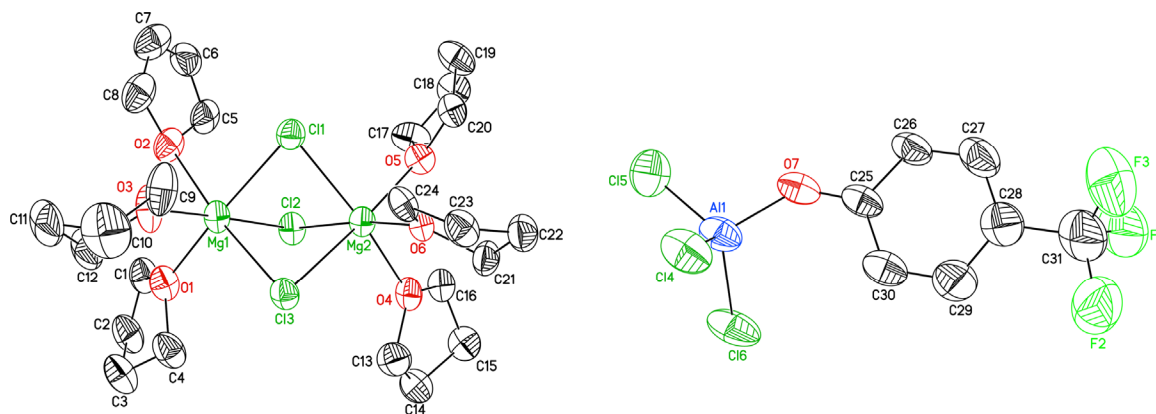

**Figure S9.** X-ray crystal structures of the molecular ions  $[\text{Mg}_2\text{Cl}_3(\text{THF})_6]^+$  and  $[(\text{FMP})\text{AlCl}_3]^-$  crystallized from the  $(\text{FPMC})_2\text{-AlCl}_3/\text{THF}$  electrolyte solution.

**Table S4.** Crystal data and structure refinement for en51302a (CCDC # 962674)

|                                        |                                                                      |
|----------------------------------------|----------------------------------------------------------------------|
| Identification code                    | en51302a                                                             |
| Empirical formula                      | $\text{C}_{31}\text{H}_{52}\text{AlCl}_6\text{Mg}_2\text{O}_7$       |
| Formula weight                         | 882.03                                                               |
| Temperature                            | 85(2) K                                                              |
| Wavelength                             | 1.54178 Å                                                            |
| Crystal system, space group            | Orthorhombic, <i>Pbca</i>                                            |
| Unit cell dimensions                   | $a = 19.9228(4)$ Å<br>$b = 15.0009(3)$ Å<br>$c = 28.215(2)$ Å        |
| Volume                                 | 8432.4(6) Å <sup>3</sup>                                             |
| $Z$ , $\rho_{\text{calc}}$             | 8, 1.390 g/cm <sup>3</sup>                                           |
| Absorption coefficient                 | 4.679 mm <sup>-1</sup>                                               |
| $F(000)$                               | 3680                                                                 |
| Crystal size                           | 0.18 × 0.10 × 0.10 mm                                                |
| $\theta$ range for data collection     | 3.13 – 68.23°                                                        |
| Limiting indices                       | $-23 \leq h \leq 24$<br>$-18 \leq k \leq 18$<br>$-33 \leq l \leq 33$ |
| Reflections collected/unique           | 243483 / 7714 [ $R(\text{int}) = 0.1127$ ]                           |
| Completeness to $\theta = 68.23^\circ$ | 100.0%                                                               |
| Absorption correction                  | Semi-empirical from equivalents                                      |
| Max. and min. transmission             | 0.6519 and 0.4863                                                    |
| Refinement method                      | Full-matrix least-squares on $F^2$                                   |
| Data / restraints / parameters         | 7714 / 776 / 728                                                     |
| $G.o.F.$ on $F^2$                      | 1.072                                                                |
| Final $R$ indices [ $I > 2\sigma(I)$ ] | $R1 = 0.0807$ ; $wR2 = 0.2135$                                       |
| $R$ indices (all data)                 | $R1 = 0.0843$ , $wR2 = 0.2162$                                       |
| Extinction coefficient                 | 0.00066(4)                                                           |
| Largest diff. peak and hole            | 0.711 and $-0.726$ eÅ <sup>-3</sup>                                  |

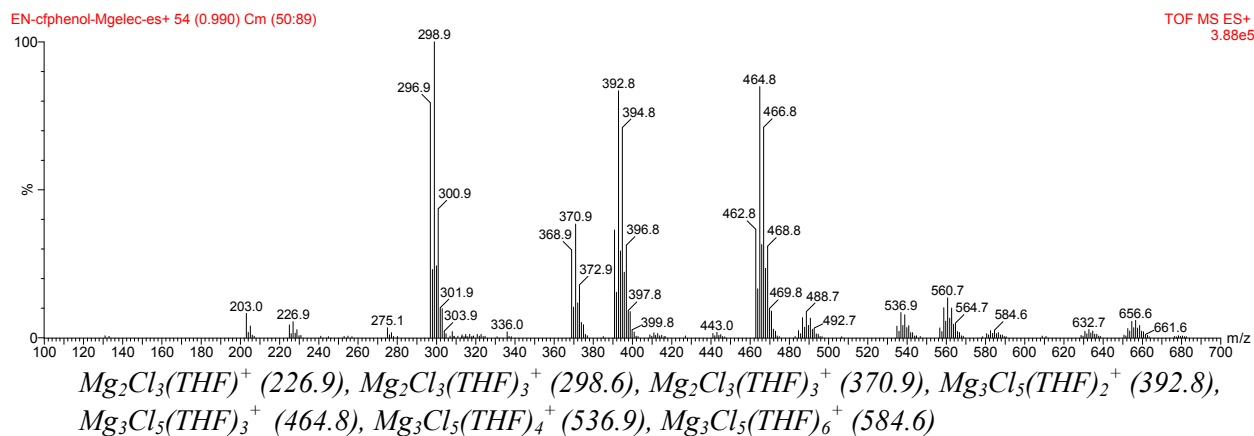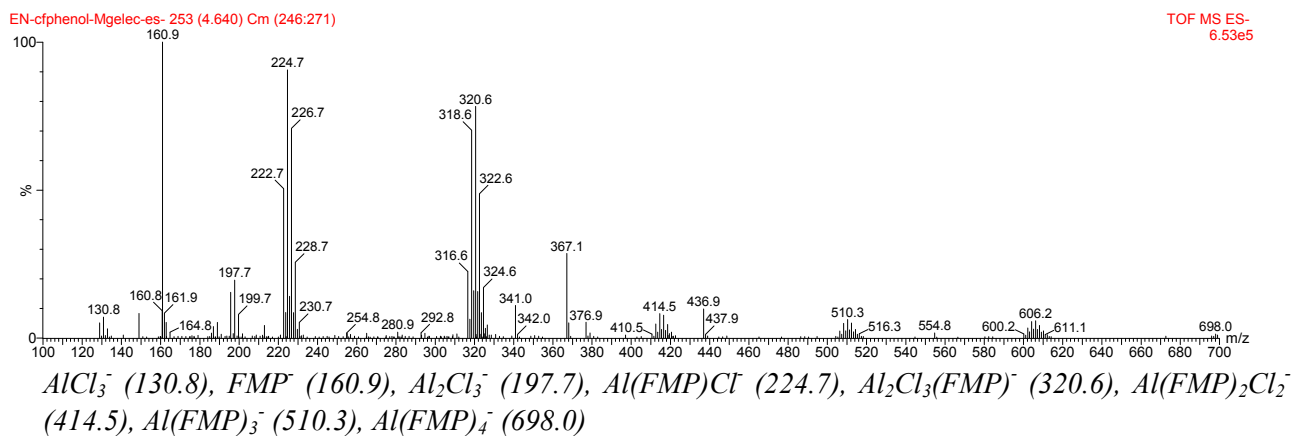

**Figure S10.** Electrospray ionization mass spectra of (FMPMC)<sub>2</sub>-AlCl<sub>3</sub>/THF electrolyte in positive-ion mode (top) and negative-ion mode (bottom)

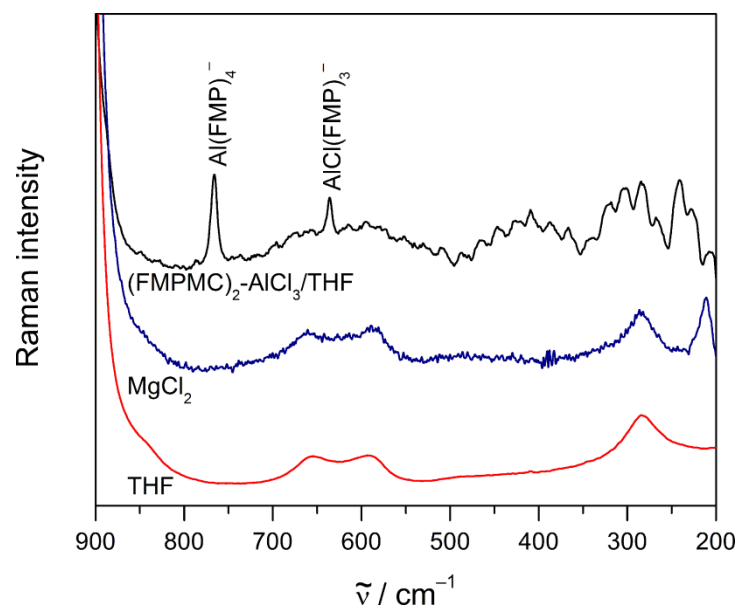

**Figure S11.** Raman spectra of  $(\text{FMPMC})_2\text{-AlCl}_3/\text{THF}$  electrolyte.<sup>8–11</sup>

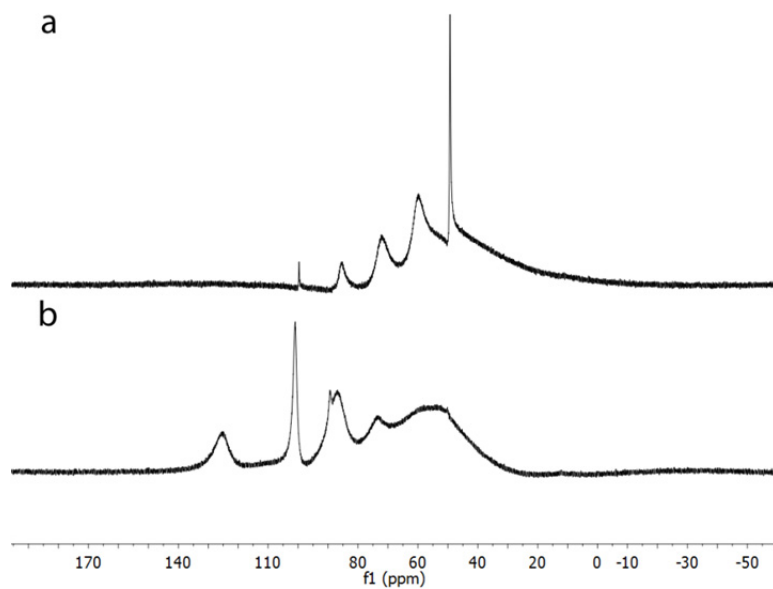

**Figure S12.**  $^{27}\text{Al}$  NMR spectra of  $(\text{FMPMC})_2\text{-AlCl}_3/\text{THF}$  a) before and b) after electrolysis at 3.5 V vs.  $\text{Mg}^{2+/0}$  for 90 minutes.

---

## References

- 1 O. Mizrahi, N. Amir, E. Pollak, O. Chusid, V. Marks, H. Gottlieb, L. Larush, E. Zinigrad, D. Aurbach, *J. Electrochem. Soc.* 2008, **155**, A103-A109.
- 2 H. Gizbar, Y. Vestfrid, O. Chusid, Y. Gofer, H. E. Gottlieb, V. Marks, D. Aurbach, *Organometallics* 2004, **23**, 3826-3831.
- 3 G. M. Sheldrick, SHELXTL, v. 2008/4; Bruker Analytical X-ray, Madison, WI, 2008.
- 4 Saint Plus, v. 7.60A, Bruker Analytical X-ray, Madison, WI, 2009.
- 5 G. M. Sheldrick, SADABS, v. 2008/1. Program for Empirical Absorption Correction of Area Detector Data, University of Gottingen: Gottingen, Germany, 2008.
- 6 CrystalClear Expert 2.0 r12, Rigaku Americas and Rigaku Corporation (2011), Rigaku Americas, 9009, TX, USA 77381-5209, Rigaku Tokyo, 196-8666, Japan.
- 7 F. Wang, Y. Guo, J. Yang, Y. Nuli, S. Hirano, *Chem. Commun.* **2012**, 48, 10763-10765.
- 8 Y. Vestfried, O. Chusid, Y. Goffer, P. Aped, D. Aurbach, *Organometallics* 2007, **26**, 3130-3137.
- 9 A. Decken, H. Jenkins, G. Nikiforov, J. Passmore, *Dalton Trans.* 2004, 2496-2504.
- 10 N. Tomar, E. Ghanti, A. Bhagi, R. Nagarajan, *Journal of Non-Crystalline Solids* 2009, **355**, 2657-2662.
- 11 M. Gonsior, I. Krossing, L. Muller, I. Raabe, M. Jansen, L. van Wullen, *Chem. Eur. J.* 2002, **8**, 4475-4492.
